# Supplementary material for: Gene pool transmission of multidrug resistance among Campylobacter from livestock, sewage and human disease
Source: PubMed Central journal article supplement (PMC6916351; doi:10.1111/1462-2920.14760), 2019-08-27

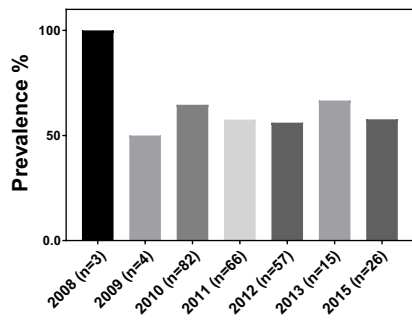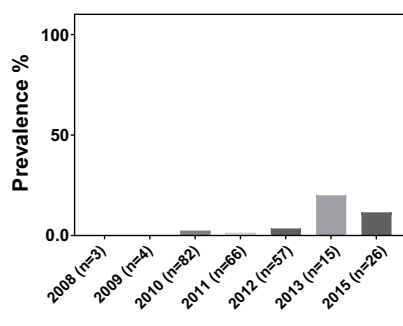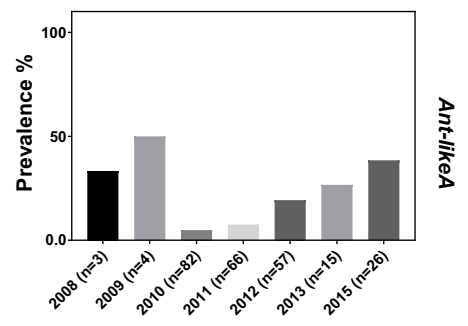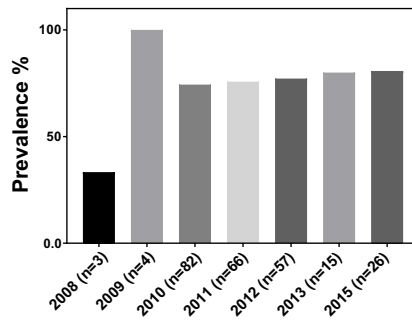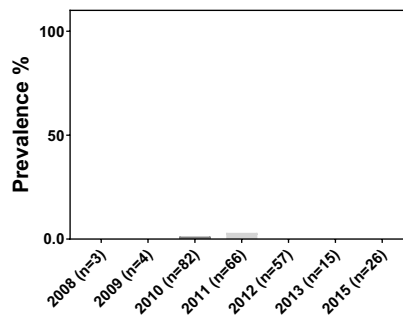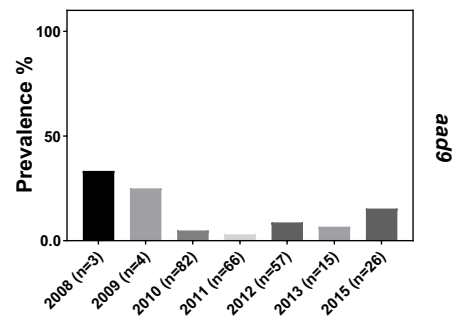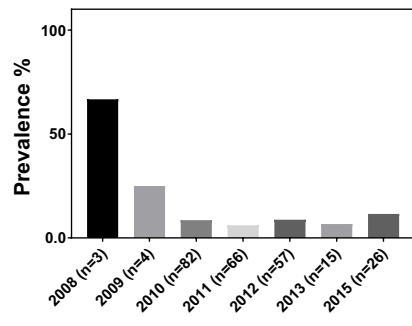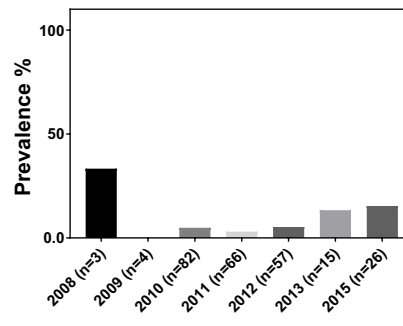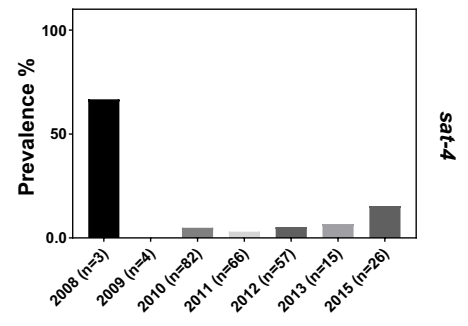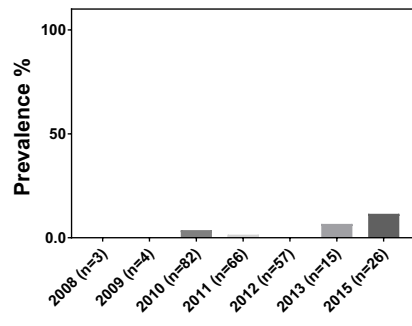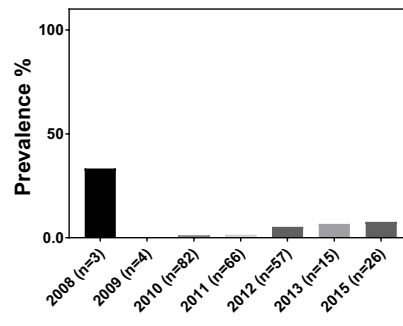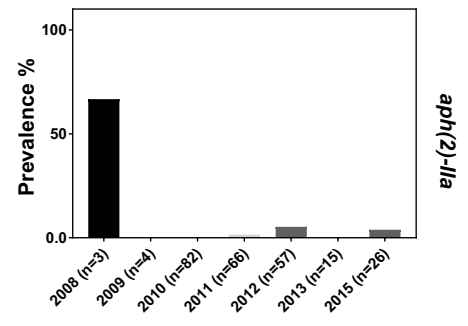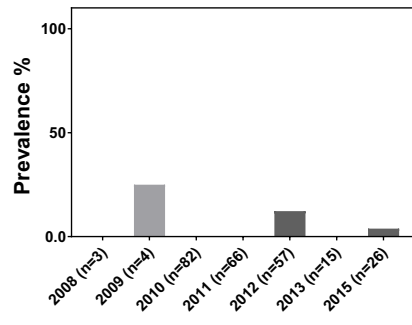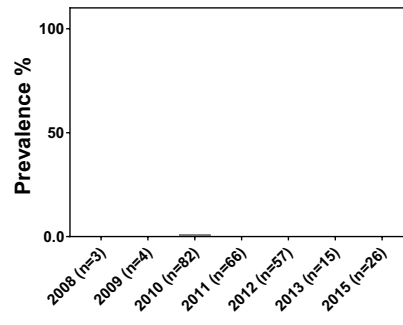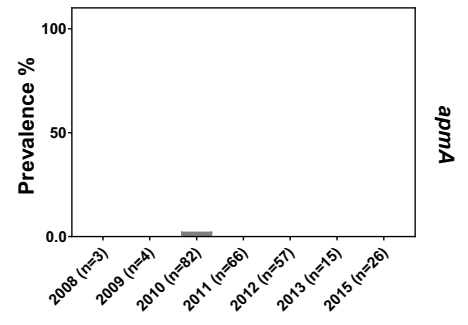

Supplement: EMI-21-4597-s002.pdf [file EMI-21-4597-s002.pdf]
