# Supplementary material for: Gene pool transmission of multidrug resistance among Campylobacter from livestock, sewage and human disease
Source: PubMed Central journal article supplement (PMC6916351; doi:10.1111/1462-2920.14760), 2019-08-27
Supplement: EMI-21-4597-s003.pdf [file EMI-21-4597-s003.pdf]

|      |       |                 |      |           |         |      |        |         |     |   |                         |            |
|------|-------|-----------------|------|-----------|---------|------|--------|---------|-----|---|-------------------------|------------|
| 5252 | HSA37 | ZTA13/00909     | 2010 | C. jejuni | Human   | 990  | ST-257 | 1651217 | 345 | Y | Non-multidrug resistant | SRR8785467 |
| 5253 | HSA38 | ZTA13/00910     | 2010 | C. jejuni | Human   | 354  | ST-354 | 1650110 | 568 | Y | Non-multidrug resistant | SRR8785296 |
| 5254 | HSA39 | ZTA13/00911     | 2010 | C. jejuni | Human   |      |        | 1187596 | 938 | Y | Non-multidrug resistant | SRR8785295 |
| 5255 | HSA40 | ZTA13/00912     | 2010 | C. jejuni | Human   | 441  |        | 1620762 | 140 | Y | Multidrug resistant     | SRR8785297 |
| 5256 | HSA41 | ZTA13/00913     | 2010 | C. jejuni | Human   | 356  | ST-353 | 1452912 | 917 | Y | Non-multidrug resistant | SRR8785292 |
| 5257 | HSA42 | ZTA13/00914     | 2010 | C. jejuni | Human   | 464  | ST-464 | 1716511 | 206 | Y | Non-multidrug resistant | SRR8785291 |
| 5258 | HSA43 | ZTA13/00915     | 2010 | C. jejuni | Human   |      | ST-354 | 1734414 | 225 | Y | Non-multidrug resistant | SRR8785294 |
| 5259 | HSA44 | ZTA13/00916     | 2010 | C. jejuni | Human   | 21   | ST-21  | 1629536 | 524 | Y | Non-multidrug resistant | SRR8785393 |
| 5260 | HSA45 | ZTA13/00917     | 2010 | C. jejuni | Human   | 52   | ST-52  | 1714057 | 342 | Y | Non-multidrug resistant | SRR8785300 |
| 5262 | HSA47 | ZTA13/00919     | 2010 | C. jejuni | Human   | 22   | ST-22  | 1585839 | 301 | Y | Non-multidrug resistant | SRR8785351 |
| 5263 | HSA48 | ZTA13/00920     | 2010 | C. jejuni | Human   | 122  | ST-206 | 1589773 | 375 | Y | Non-multidrug resistant | SRR8785352 |
| 5264 | AV.01 | ZTA10/00684 CPD | 2010 | C. jejuni | Broiler | 45   | ST-45  | 1632398 | 157 | Y | Non-multidrug resistant | SRR8785338 |
| 5267 | AV.04 | ZTA10/01723 CPD | 2010 | C. jejuni | Broiler | 354  | ST-354 | 1677109 | 214 | Y | Multidrug resistant     | SRR8785337 |
| 5270 | AV.07 | ZTA10/00766 CPD | 2010 | C. jejuni | Broiler | 227  | ST-206 | 1712981 | 147 | Y | Multidrug resistant     | SRR8785336 |
| 5271 | AV.08 | ZTA10/01430 CPD | 2010 | C. jejuni | Broiler | 4016 | ST-42  | 1608295 | 441 | Y | Non-multidrug resistant | SRR8785335 |
| 5272 | AV.09 | ZTA10/00909 CPD | 2010 | C. jejuni | Broiler | 464  | ST-464 | 1734911 | 184 | Y | Multidrug resistant     | SRR8785342 |
| 5274 | AV.11 | ZTA10/02105 CPD | 2010 | C. jejuni | Broiler | 3030 |        | 1643257 | 68  | Y | Multidrug resistant     | SRR8785341 |
| 5275 | AV.12 | ZTA10/02531 CPF | 2010 | C. jejuni | Broiler | 572  | ST-206 | 1765209 | 341 | Y | Multidrug resistant     | SRR8785340 |
| 5276 | AV.13 | ZTA10/02577 CPD | 2010 | C. jejuni | Broiler | 137  | ST-45  | 1591527 | 136 | Y | Multidrug resistant     | SRR8785339 |
| 5279 | AV.16 | ZTA10/01722 CPD | 2010 | C. jejuni | Broiler | 7110 | ST-607 | 1794198 | 114 | Y | Non-multidrug resistant | SRR8785334 |
| 5281 | AV.18 | ZTA10/02640 CPF | 2010 | C. jejuni | Broiler | 52   | ST-52  | 1685326 | 176 | Y | Non-multidrug resistant | SRR8785333 |
| 5282 | AV.19 | ZTA10/01246 CPD | 2010 | C. jejuni | Broiler | 1710 |        | 1694517 | 198 | Y | Non-multidrug resistant | SRR8785391 |
| 5284 | AV.21 | ZTA10/02641 CPD | 2010 | C. jejuni | Broiler | 441  |        | 1669889 | 48  | Y | Non-multidrug resistant | SRR8785390 |
| 5285 | AV.22 | ZTA11/01072 CP  | 2011 | C. jejuni | Broiler | 137  | ST-45  | 1587285 | 159 | Y | Multidrug resistant     | SRR8785393 |
| 5286 | AV.23 | ZTA11/01302 CP  | 2011 | C. jejuni | Broiler | 45   | ST-45  | 1655424 | 304 | Y | Multidrug resistant     | SRR8785392 |
| 5287 | AV.24 | ZTA11/01874 CP  | 2011 | C. jejuni | Broiler | 137  | ST-45  | 1587020 | 161 | Y | Multidrug resistant     | SRR8785395 |
| 5288 | AV.25 | ZTA11/02059 CP  | 2010 | C. jejuni | Broiler | 469  | ST-42  | 1592332 | 307 | Y | Non-multidrug resistant | SRR8785394 |
| 5289 | AV.26 | ZTA11/02314 CP  | 2011 | C. jejuni | Broiler | 21   | ST-21  | 1536243 | 633 | Y | Non-multidrug resistant | SRR8785397 |
| 5291 | AV.28 | ZTA11/03523     | 2011 | C. jejuni | Broiler | 1044 | ST-658 | 1669660 | 267 | Y | Non-multidrug resistant | SRR8785396 |
| 5293 | BO.02 | ZTA10/01617 CPD | 2010 | C. jejuni | Cattle  | 4016 | ST-42  | 1610199 | 250 | Y | Non-multidrug resistant | SRR8785389 |
| 5295 | BO.04 | ZTA10/02583 CPF | 2010 | C. jejuni | Cattle  | 61   | ST-61  | 1648771 | 132 | Y | Non-multidrug resistant | SRR8785388 |
| 5296 | BO.05 | ZTA10/00655 CPD | 2010 | C. jejuni | Cattle  | 122  | ST-206 | 1686208 | 77  | Y | Non-multidrug resistant | SRR8785364 |
| 5297 | BO.06 | ZTA10/00681 CPD | 2010 | C. jejuni | Cattle  | 354  | ST-354 | 1712074 | 181 | Y | Non-multidrug resistant | SRR8785365 |
| 5298 | BO.07 | ZTA10/00761 CPD | 2010 | C. jejuni | Cattle  | 464  | ST-464 | 1727851 | 169 | Y | Non-multidrug resistant | SRR8785366 |
| 5299 | BO.08 | ZTA10/01043 CPD | 2010 | C. jejuni | Cattle  | 50   | ST-21  | 1677598 | 160 | Y | Non-multidrug resistant | SRR8785367 |
| 5300 | BO.09 | ZTA10/01185 CPD | 2010 | C. jejuni | Cattle  | 61   | ST-61  | 1656093 | 62  | Y | Multidrug resistant     | SRR8785360 |
| 5301 | BO.10 | ZTA10/01678 CPD | 2010 | C. jejuni | Cattle  | 21   | ST-21  | 1719251 | 246 | Y | Multidrug resistant     | SRR8785361 |
| 5302 | BO.11 | ZTA10/00700 CPD | 2010 | C. jejuni | Cattle  | 42   | ST-42  | 1564065 | 276 | Y | Sensitive               | SRR8785362 |
| 5303 | BO.12 | ZTA10/00900 CPF | 2010 | C. jejuni | Cattle  | 19   | ST-21  | 1656504 | 80  | Y | Non-multidrug resistant | SRR8785363 |
| 5304 | BO.13 | ZTA10/00951 CPD | 2010 | C. jejuni | Cattle  | 42   | ST-42  | 1594226 | 51  | Y | Multidrug resistant     | SRR8785358 |
| 5305 | BO.14 | ZTA10/01185 CPD | 2010 | C. jejuni | Cattle  | 61   | ST-61  | 1647767 | 138 | Y | Multidrug resistant     | SRR8785359 |
| 5306 | BO.15 | ZTA10/01333 CPD | 2010 | C. jejuni | Cattle  | 441  |        | 1622297 | 117 | Y | Non-multidrug resistant | SRR8785346 |
| 5307 | BO.16 | ZTA10/01411 CPD | 2010 | C. jejuni | Cattle  | 61   | ST-61  | 1757133 | 121 | Y | Non-multidrug resistant | SRR8785345 |
| 5308 | BO.17 | ZTA10/02289 CPD | 2010 | C. jejuni | Cattle  | 122  | ST-206 | 1756195 | 45  | Y | Multidrug resistant     | SRR8785344 |
| 5309 | BO.18 | ZTA10/02492 CPD | 2010 | C. jejuni | Cattle  | 575  | ST-42  | 1699842 | 87  | Y | Sensitive               | SRR8785343 |
| 5311 | BO.20 | ZTA10/00575 CPD | 2010 | C. jejuni | Cattle  | 21   | ST-21  | 1713503 | 136 | Y | Multidrug resistant     | SRR8785349 |
| 5313 | BO.22 | ZTA11/00934 CP  | 2011 | C. jejuni | Cattle  | 21   | ST-21  | 1714986 | 96  | Y | Multidrug resistant     | SRR8785348 |
| 5316 | BO.25 | ZTA11/03537 CP  | 2011 | C. jejuni | Cattle  | 61   | ST-61  | 1595849 | 493 | Y | Non-multidrug resistant | SRR8785347 |
| 5317 | BO.26 | ZTA11/03821 CP  | 2011 | C. jejuni | Cattle  | 21   | ST-21  | 1708914 | 102 | Y | Non-multidrug resistant | SRR8785312 |
| 5318 | BO.27 | ZTA11/02705 CP  | 2011 | C. jejuni | Cattle  | 61   | ST-61  | 1578679 | 687 | Y | Non-multidrug resistant | SRR8785301 |
| 5321 | BO.30 | ZTA11/01052 CP  | 2011 | C. jejuni | Cattle  | 61   | ST-61  | 1634301 | 318 | Y | Non-multidrug resistant | SRR8785329 |
| 5322 | BO.31 | ZTA11/03823 CP  | 2011 | C. jejuni | Cattle  | 61   | ST-61  | 1645542 | 193 | Y | Non-multidrug resistant | SRR8785330 |
| 5324 | BO.33 | ZTA11/02069 CP  | 2011 | C. jejuni | Cattle  | 52   | ST-52  | 1731269 | 61  | Y | Multidrug resistant     | SRR8785327 |
| 5325 | BO.34 | ZTA11/01530 CP  | 2011 | C. jejuni | Cattle  | 586  |        | 1689073 | 88  | Y | Non-multidrug resistant | SRR8785328 |
| 5327 | BO.36 | ZTA11/01842 CP  | 2011 | C. jejuni | Cattle  | 42   | ST-42  | 1743650 | 74  | Y | Non-multidrug resistant | SRR8785325 |
