# Supplementary material for: Gene pool transmission of multidrug resistance among Campylobacter from livestock, sewage and human disease
Source: PubMed Central journal article supplement (PMC6916351; doi:10.1111/1462-2920.14760), 2019-08-27
Supplement: EMI-21-4597-s004.pdf [file EMI-21-4597-s004.pdf]

**Table S2. Isolates and their MIC against different antibiotics used in this study**

| Antibiotic     | Species          | MIC Range (mg/L) | ECOFF (mg/L)* | Isolates per MIC value (mg/L) |      |     |    |    |    |    |    |    |    |     |      | Resistant isolates (%) |                  |
|----------------|------------------|------------------|---------------|-------------------------------|------|-----|----|----|----|----|----|----|----|-----|------|------------------------|------------------|
|                |                  |                  |               | 0.12                          | 0.25 | 0.5 | 1  | 2  | 4  | 8  | 16 | 32 | 64 | 128 | >128 |                        |                  |
| Ciprofloxacin  | <i>C. jejuni</i> | 0.12 - 16        | 0.5           | 8                             | 6    | 2   | 6  | 1  |    |    | 42 | 22 | 46 | 24  | 2    | 3                      | 146/163 (89.57%) |
|                | <i>C. coli</i>   |                  | 0.5           | 1                             | 3    | 1   |    | 1  | 17 | 57 | 7  |    |    | 2   | 2    |                        | 86/91 (94.50%)   |
| Nalidixic acid | <i>C. jejuni</i> | 1 - 64           | 16            |                               |      |     | 3  |    | 3  | 14 |    | 2  | 9  | 72  | 33   | 116/163 (71.16%)       |                  |
|                | <i>C. coli</i>   |                  | 16            |                               |      |     |    |    |    | 4  | 2  | 14 | 14 | 56  |      | 84/91 (92.31%)         |                  |
| Tetracycline   | <i>C. jejuni</i> | 0.5 - 64         | 1             |                               | 7    | 1   | 7  | 5  | 11 | 1  | 4  | 43 | 26 | 42  | 17   | 149/163 (91.41%)       |                  |
|                | <i>C. coli</i>   |                  | 2             |                               |      | 2   | 2  | 1  |    |    |    | 58 | 12 | 14  | 2    | 86/91 (94.5%)          |                  |
| Erythromycin   | <i>C. jejuni</i> | 1 - 128          | 4             | 1                             | 1    | 48  | 66 | 40 | 3  | 1  |    |    | 3  |     |      | 4/163 (2.45%)          |                  |
|                | <i>C. coli</i>   |                  | 8             |                               |      | 2   | 45 | 19 | 1  | 1  | 1  | 2  | 8  | 7   | 5    | 23/91 (25.3%)          |                  |
| Streptomycin   | <i>C. jejuni</i> | 0.25 - 16        | 4             |                               |      |     | 27 | 57 | 54 | 7  | 1  | 13 |    | 1   | 2    | 24/163 (14.72%)        |                  |
|                | <i>C. coli</i>   |                  | 4             |                               | 1    | 7   | 9  | 10 | 6  | 3  | 3  | 43 | 7  | 2   |      | 58/91 (63.7%)          |                  |
| Gentamycin     | <i>C. jejuni</i> | 0.12 - 16        | 2             |                               | 4    | 10  | 51 | 96 | 1  |    | 1  |    |    |     |      | 2/163 (1.23%)          |                  |
|                | <i>C. coli</i>   |                  | 2             | 12                            | 21   | 34  | 6  | 8  |    |    |    | 10 |    |     |      | 10/91 (11%)            |                  |

\*EUCAST: *C. coli* and *C. jejuni* data from EUCAST (last accessed on: June 2017)
