# Supplementary material for: Gene pool transmission of multidrug resistance among Campylobacter from livestock, sewage and human disease
Source: PubMed Central journal article supplement (PMC6916351; doi:10.1111/1462-2920.14760), 2019-08-27
Supplement: EMI-21-4597-s005.pdf [file EMI-21-4597-s005.pdf]

**Table S3. Resistance phenotype-genotype correlations among *Campylobacter* isolates**

| Drug class      | Antibiotic tested | Phenotypes (no. of isolates) <sup>a</sup> | Genotypes (no. of isolates)                                                                                                                                                                                                                               | Correlation % <sup>b</sup> | p-value <sup>d</sup> |
|-----------------|-------------------|-------------------------------------------|-----------------------------------------------------------------------------------------------------------------------------------------------------------------------------------------------------------------------------------------------------------|----------------------------|----------------------|
| Tetracyclines   | Tetracycline      | R, 235                                    | <i>tetO</i> (n=194)                                                                                                                                                                                                                                       | 82.3 (194/235)             | <0.001               |
|                 |                   | S, 20                                     | None                                                                                                                                                                                                                                                      | 100 (20/20)                |                      |
| Macrolides      | Erythromycin      | R, 27                                     | <i>ermB</i> (n=1)                                                                                                                                                                                                                                         | 3.7 (1/27) <sup>c</sup>    | 0.11                 |
|                 |                   | S, 227                                    | None                                                                                                                                                                                                                                                      | 100 (227/227)              |                      |
| Aminoglycosides | Streptomycin      | R, 82                                     | <i>ant-like B</i> (n=6), <i>ant-like A</i> (n=34), <i>sat-1</i> (n=3), <i>aad9</i> (n=18), <i>ant(6)-Ib</i> (n=23), <i>ant(6)-Ia</i> (n=14), <i>sat-4</i> (n=14), <i>aph(3)-IIIa</i> (n=5), <i>hpt</i> (n=9), <i>aph(2) IIIa</i> (n=7), <i>apmA</i> (n=2) | 69.5 (57/82)               | <0.001               |
|                 |                   | S, 172                                    | <i>ant-like B</i> (n=5), <i>ant-like A</i> (n=5), <i>ant(6)-Ia</i> (n=2), <i>sat-4</i> (n=2), <i>aph(3)-IIIa</i> (n=2)                                                                                                                                    | 4.1 (7/172)                |                      |
|                 | Gentamicin        | R, 12                                     | <i>ant-like B</i> (n=1), <i>ant-like A</i> (n=3), <i>aad9</i> (n=9), <i>ant(6)-Ib</i> (n=9), <i>ant(6)-Ia</i> (n=6), <i>sat-4</i> (n=7), <i>hpt</i> (n=6), <i>aph(2)-IIIa</i> (n=7), <i>apmA</i> (n=2)                                                    | 91.7 (11/12)               | <0.001               |
|                 |                   | S, 242                                    | <i>ant-like B</i> (n=10), <i>ant-like A</i> (n=36), <i>sat-1</i> (n=3), <i>aad9</i> (n=9), <i>ant(6)-Ib</i> (n=14), <i>ant(6)-Ia</i> (n=10), <i>sat-4</i> (n=9), <i>aph(3)-IIIa</i> (n=7), <i>hpt</i> (n=3)                                               | 21.9 (53/242)              |                      |

<sup>a</sup> R, resistant; S, susceptible

<sup>b</sup> Number of isolates carrying an AMR gene conferring resistance to the associated antibiotic/number of isolates with the resistant phenotype

<sup>c</sup> A number of 27 isolates were resistant to erythromycin, but only one isolate contained the corresponding resistant gene

<sup>d</sup> Fisher's exact test with 95% confidence interval
