# Supplementary material for: Gene pool transmission of multidrug resistance among Campylobacter from livestock, sewage and human disease
Source: PubMed Central journal article supplement (PMC6916351; doi:10.1111/1462-2920.14760), 2019-08-27
Supplement: EMI-21-4597-s006.pdf [file EMI-21-4597-s006.pdf]

**Table S4. Antibiotic drug classes, their mechanism of action, their associated AMR genes and their resistance mechanisms**

| Drug class       | Antibiotics                                                  | Antibiotic Mechanism                                                                                                            | Antimicrobial genes                                                                                          | Resistance Mechanism                                                                                                                                                                               |
|------------------|--------------------------------------------------------------|---------------------------------------------------------------------------------------------------------------------------------|--------------------------------------------------------------------------------------------------------------|----------------------------------------------------------------------------------------------------------------------------------------------------------------------------------------------------|
| Fluoroquinolones | Ciprofloxacin/nalidixic acid                                 | Target DNA gyrase and topoisomerase IV, impair DNA replication                                                                  | -                                                                                                            | Point mutations in GyrA gene, functional efflux pump (CmeABC)                                                                                                                                      |
| Tetracyclines    | Tetracycline                                                 | Protein synthesis inhibition - prevent attachment of aminoacyl-tRNA to the ribosomal acceptor site                              | <i>tetO</i>                                                                                                  | Ribosomal protection proteins actively removing tetracycline from the ribosome in a GTP hydrolysis-dependent fashion                                                                               |
| Macrolides       | Erythromycin, Azithromycin                                   | Target 50S subunit of bacterial ribosome and inhibit protein synthesis through interference with the peptide translocation step | <i>ermB</i>                                                                                                  | Modifications of the ribosomal target via enzyme-mediated methylation, point mutation in domain V of the 23S rRNA and/or ribosomal proteins L4 and L22, functional multidrug efflux pump (CmeABC)  |
| Aminoglycosides  | Apramycin, Gentamicin, Streptomycin, Kanamycin, Hygromycin B | Bactericidal action - bind to ribosomes and inhibits protein synthesis                                                          | <i>aph(2)-IIIa, aph(3)-IIIa, sat-1, sat-4, aad9, ant-like B, ant-like A, ant(6)-Ia, ant(6)-Ib, hpt, apmA</i> | Modification of the antibiotic structure - Phosphorylation of the 3' hydroxyl group of aminoglycosides (e.g. aminoglycoside acetyltransferases, phosphotransferases and nucleotidyl-transferases)  |
| Phenolics        | Chloramphenicol                                              | Bacteriostatic action - binds to bacterial ribosome via blocking the peptidyl transferase and inhibits protein synthesis        | -                                                                                                            | Enzymatic inactivation by chloramphenicol acetyltransferases, target site mutation in 23S rRNA, target site modification in 23S rRNA by rRNA methyltransferase, enhanced extrusion by efflux pumps |
| Lincosamides     | Lincomycin, Clindamycin                                      | Protein synthesis inhibition - prevent peptidyltransferase binding to the 50S subunit of the bacterial ribosome                 | <i>lnuC</i>                                                                                                  | Phosphorylation and nucleotidylation of the hydroxyl group of lincosamides by lincosamide nucleotidyltransferases, N <sup>6</sup> dimethylation of an adenine residue of the 23S rRNA molecule     |
| β-lactams        | Amoxicillin, Ampicillin                                      | Inhibit bacterial cell wall biosynthesis                                                                                        | <i>bla<sub>OXA-61</sub></i>                                                                                  | enzymatic inactivation, reduced uptake, functional efflux pumps (CmeABC)                                                                                                                           |
