# Supplementary material for: Gene pool transmission of multidrug resistance among Campylobacter from livestock, sewage and human disease
Source: PubMed Central journal article supplement (PMC6916351; doi:10.1111/1462-2920.14760), 2019-08-27
Supplement: EMI-21-4597-s007.pdf [file EMI-21-4597-s007.pdf]

Table S5. Genomic and phenotypic details of all isolates used in this study

| Id   | Strain name | Species          | Nalidixic acid (>16) | Ciprofloxacin (>0.5) | Tetracycline (>2) | Erythromycin (>8) | Streptomycin (>4) | Gentamycin (>2) | bla OXA-61 | tetO | ant-like B | ant-like A | ant(6)-la | sat-4 | lucC | ant(6)-lb | aad9 | aph(3)-IIIa | aph(2)-IIIa | hpt | apmA | sat-1 | ermB |
|------|-------------|------------------|----------------------|----------------------|-------------------|-------------------|-------------------|-----------------|------------|------|------------|------------|-----------|-------|------|-----------|------|-------------|-------------|-----|------|-------|------|
| 5040 | D.01        | <i>C. coli</i>   | 128                  | 8                    | 32                | 1                 | 32                | 0.5             | 0          | 2    | 0          | 0          | 0         | 0     | 0    | 2         | 2    | 0           | 0           | 2   | 0    | 0     | 0    |
| 5041 | D.03        | <i>C. coli</i>   | 128                  | 8                    | 32                | 2                 | 32                | 0.5             | 0          | 3    | 0          | 2          | 0         | 0     | 0    | 0         | 0    | 0           | 0           | 0   | 0    | 0     | 0    |
| 5042 | D.05        | <i>C. coli</i>   | 128                  | 8                    | 32                | 1                 | 32                | 0.5             | 0          | 4    | 0          | 3          | 0         | 0     | 0    | 0         | 0    | 0           | 0           | 0   | 0    | 0     | 0    |
| 5043 | D.07        | <i>C. coli</i>   | 128                  | 8                    | 32                | 1                 | 32                | 32              | 0          | 0    | 0          | 0          | 2         | 0     | 0    | 2         | 3    | 0           | 2           | 1   | 0    | 0     | 0    |
| 5044 | D.08        | <i>C. coli</i>   | 128                  | 8                    | 32                | 1                 | 32                | 0.5             | 0          | 4    | 0          | 0          | 0         | 0     | 0    | 0         | 0    | 0           | 0           | 0   | 0    | 0     | 0    |
| 5045 | D.09        | <i>C. coli</i>   | 8                    | 0.5                  | 32                | 1                 | 32                | 0.5             | 0          | 4    | 0          | 4          | 0         | 0     | 0    | 0         | 0    | 0           | 0           | 0   | 0    | 0     | 0    |
| 5046 | D.10        | <i>C. coli</i>   | 128                  | 8                    | 32                | 1                 | 2                 | 0.5             | 0          | 5    | 0          | 0          | 0         | 0     | 0    | 0         | 0    | 0           | 0           | 0   | 0    | 0     | 0    |
| 5047 | D.11        | <i>C. coli</i>   | 128                  | 8                    | 1                 | 0.5               | 2                 | 0.25            | 0          | 0    | 0          | 0          | 0         | 0     | 0    | 0         | 0    | 0           | 0           | 0   | 0    | 0     | 0    |
| 5048 | D.12        | <i>C. coli</i>   | 128                  | 8                    | 32                | 64                | 2                 | 0.5             | 0          | 6    | 0          | 0          | 0         | 0     | 0    | 0         | 0    | 0           | 0           | 0   | 0    | 0     | 0    |
| 5049 | D.13        | <i>C. jejuni</i> | 4                    | 0.12                 | 0.25              | 0.5               | 2                 | 0.5             | 0          | 0    | 0          | 0          | 0         | 0     | 0    | 0         | 0    | 0           | 0           | 0   | 0    | 0     | 0    |
| 5050 | D.14        | <i>C. coli</i>   | 8                    | 0.12                 | 0.32              | 1                 | 32                | 0.5             | 1          | 4    | 0          | 3          | 0         | 0     | 0    | 0         | 0    | 0           | 0           | 0   | 0    | 0     | 0    |
| 5051 | D.15        | <i>C. coli</i>   | 128                  | 8                    | 32                | 1                 | 32                | 32              | 0          | 4    | 0          | 3          | 0         | 0     | 0    | 0         | 0    | 0           | 0           | 0   | 0    | 0     | 0    |
| 5052 | D.16        | <i>C. coli</i>   | 128                  | 8                    | 32                | 64                | 32                | 0.25            | 0          | 7    | 0          | 0          | 0         | 0     | 0    | 0         | 0    | 0           | 0           | 0   | 0    | 0     | 0    |
| 5053 | D.17        | <i>C. coli</i>   | 128                  | 8                    | 32                | 32                | 32                | 0.5             | 0          | 7    | 0          | 3          | 0         | 0     | 0    | 0         | 0    | 0           | 0           | 0   | 0    | 0     | 0    |
| 5054 | D.18        | <i>C. coli</i>   | 128                  | 8                    | 32                | 32                | 32                | 0.5             | 0          | 7    | 0          | 5          | 0         | 0     | 0    | 0         | 0    | 0           | 0           | 0   | 0    | 0     | 0    |
| 5055 | D.19        | <i>C. jejuni</i> | 64                   | 8                    | 0.25              | 0.5               | 1                 | 0.25            | 0          | 0    | 0          | 0          | 0         | 0     | 0    | 0         | 0    | 0           | 0           | 0   | 0    | 0     | 0    |
| 5056 | D.20        | <i>C. coli</i>   | 128                  | 8                    | 32                | 2                 | 4                 | 0.5             | 2          | 8    | 0          | 0          | 0         | 0     | 2    | 0         | 0    | 0           | 0           | 0   | 0    | 0     | 0    |
| 5057 | D.21        | <i>C. coli</i>   | 128                  | 8                    | 32                | 2                 | 32                | 0.5             | 0          | 4    | 0          | 5          | 0         | 0     | 0    | 0         | 0    | 0           | 0           | 0   | 0    | 0     | 0    |
| 5058 | D.22        | <i>C. coli</i>   | 128                  | 8                    | 32                | 1                 | 2                 | 0.5             | 0          | 2    | 8          | 0          | 0         | 0     | 2    | 0         | 0    | 0           | 0           | 0   | 0    | 0     | 0    |
| 5059 | D.23        | <i>C. coli</i>   | 128                  | 8                    | 32                | 1                 | 32                | 0.5             | 0          | 4    | 0          | 3          | 0         | 0     | 0    | 0         | 0    | 0           | 0           | 0   | 0    | 0     | 0    |
| 5060 | D.24        | <i>C. coli</i>   | 128                  | 8                    | 32                | 2                 | 32                | 0.5             | 4          | 4    | 0          | 5          | 0         | 0     | 0    | 0         | 0    | 0           | 0           | 0   | 0    | 0     | 0    |
| 5061 | D.25        | <i>C. coli</i>   | 128                  | 8                    | 32                | 2                 | 32                | 0.5             | 0          | 4    | 0          | 0          | 0         | 0     | 0    | 0         | 0    | 0           | 0           | 0   | 0    | 0     | 0    |
| 5062 | D.26        | <i>C. coli</i>   | 128                  | 8                    | 32                | 2                 | 2                 | 0.5             | 4          | 8    | 0          | 0          | 0         | 0     | 2    | 0         | 0    | 0           | 0           | 0   | 0    | 0     | 0    |
| 5063 | D.27        | <i>C. coli</i>   | 128                  | 8                    | 32                | 2                 | 4                 | 0.5             | 0          | 0    | 0          | 0          | 0         | 0     | 2    | 0         | 0    | 0           | 0           | 0   | 0    | 0     | 0    |
| 5064 | D.28        | <i>C. coli</i>   | 8                    | 0.25                 | 32                | 2                 | 32                | 0.5             | 1          | 9    | 0          | 5          | 0         | 0     | 0    | 0         | 0    | 0           | 0           | 0   | 0    | 0     | 0    |
| 5065 | D.29        | <i>C. coli</i>   | 128                  | 8                    | 32                | 2                 | 32                | 0.5             | 5          | 10   | 0          | 5          | 0         | 0     | 0    | 0         | 0    | 0           | 0           | 0   | 0    | 0     | 0    |
| 5066 | D.31        | <i>C. coli</i>   | 128                  | 8                    | 32                | 1                 | 32                | 32              | 6          | 0    | 0          | 0          | 3         | 3     | 2    | 3         | 4    | 0           | 1           | 1   | 0    | 0     | 0    |
| 5067 | D.32        | <i>C. coli</i>   | 16                   | 0.25                 | 32                | 2                 | 32                | 1               | 0.5        | 3    | 1          | 11         | 0         | 0     | 0    | 0         | 0    | 0           | 0           | 0   | 0    | 0     | 0    |
| 5068 | D.33        | <i>C. coli</i>   | 128                  | 8                    | 32                | 4                 | 2                 | 0.5             | 7          | 4    | 0          | 0          | 0         | 0     | 0    | 0         | 0    | 0           | 0           | 0   | 0    | 0     | 0    |
| 5069 | D.34        | <i>C. coli</i>   | 128                  | 8                    | 32                | 2                 | 32                | 5               | 0          | 0    | 0          | 4          | 3         | 3     | 3    | 3         | 0    | 1           | 1           | 0   | 0    | 0     | 0    |
| 5070 | D.35        | <i>C. coli</i>   | 128                  | 8                    | 32                | 2                 | 32                | 0.5             | 0          | 0    | 0          | 5          | 3         | 3     | 3    | 3         | 0    | 1           | 1           | 0   | 0    | 0     | 0    |
| 5072 | D.37        | <i>C. coli</i>   | 128                  | 8                    | 32                | 2                 | 32                | 0.5             | 1          | 4    | 2          | 6          | 0         | 0     | 0    | 2         | 3    | 0           | 0           | 0   | 0    | 0     | 0    |
| 5073 | D.38        | <i>C. coli</i>   | 128                  | 8                    | 32                | 1                 | 32                | 0.25            | 0          | 4    | 3          | 7          | 0         | 0     | 0    | 2         | 5    | 0           | 0           | 0   | 0    | 0     | 0    |
| 5074 | D.39        | <i>C. coli</i>   | 128                  | 8                    | 32                | 2                 | 32                | 0.5             | 0          | 4    | 0          | 5          | 0         | 0     | 0    | 0         | 0    | 0           | 0           | 0   | 0    | 0     | 0    |
| 5075 | D.40        | <i>C. coli</i>   | 128                  | 8                    | 32                | 1                 | 2                 | 0.25            | 8          | 4    | 0          | 0          | 0         | 0     | 0    | 0         | 0    | 0           | 0           | 0   | 0    | 0     | 0    |
| 5076 | D.41        | <i>C. coli</i>   | 128                  | 8                    | 32                | 1                 | 2                 | 0.25            | 0          | 4    | 0          | 0          | 0         | 0     | 0    | 0         | 0    | 0           | 0           | 0   | 0    | 0     | 0    |
| 5077 | D.43        | <i>C. jejuni</i> | 8                    | 0.43                 | 32                | 0.5               | 128               | 0.25            | 12         | 0    | 0          | 12         | 0         | 0     | 0    | 0         | 0    | 0           | 0           | 0   | 0    | 0     | 0    |
| 5078 | D.44        | <i>C. coli</i>   | 128                  | 8                    | 32                | 1                 | 8                 | 0.5             | 5          | 13   | 0          | 0          | 0         | 0     | 0    | 0         | 0    | 0           | 0           | 0   | 0    | 0     | 0    |
| 5079 | D.45        | <i>C. coli</i>   | 128                  | 8                    | 32                | 64                | 32                | 0.5             | 1          | 14   | 0          | 0          | 6         | 0     | 0    | 0         | 0    | 0           | 0           | 0   | 0    | 0     | 0    |
| 5080 | D.47        | <i>C. coli</i>   | 128                  | 8                    | 32                | 1                 | 32                | 0.5             | 0          | 4    | 0          | 0          | 0         | 0     | 0    | 2         | 3    | 0           | 0           | 0   | 0    | 0     | 0    |
| 5081 | D.48        | <i>C. coli</i>   | 128                  | 8                    | 32                | 1                 | 16                | 0.25            | 5          | 13   | 0          | 0          | 0         | 0     | 0    | 0         | 0    | 0           | 0           | 0   | 0    | 0     | 0    |
| 5082 | D.49        | <i>C. coli</i>   | 128                  | 8                    | 2                 | 0.5               | 32                | 0.5             | 0          | 0    | 0          | 5          | 0         | 0     | 0    | 0         | 0    | 0           | 0           | 0   | 0    | 0     | 0    |
| 5083 | D.50        | <i>C. coli</i>   | 128                  | 8                    | 32                | 1                 | 2                 | 0.5             | 1          | 15   | 0          | 0          | 0         | 0     | 0    | 0         | 0    | 0           | 0           | 0   | 0    | 0     | 0    |
| 5084 | D.52        | <i>C. coli</i>   | 128                  | 8                    | 32                | 64                | 1                 | 0.25            | 8          | 4    | 0          | 0          | 0         | 0     | 0    | 0         | 0    | 0           | 0           | 0   | 0    | 0     | 0    |
| 5085 | D.53        | <i>C. coli</i>   | 128                  | 8                    | 32                | 1                 | 128               | 0.5             | 9          | 16   | 0          | 0          | 0         | 0     | 0    | 0         | 0    | 0           | 0           | 0   | 0    | 0     | 0    |
| 5086 | D.54        | <i>C. coli</i>   | 128                  | 8                    | 1                 | 1                 | 2                 | 0.5             | 0          | 0    | 0          | 0          | 0         | 0     | 0    | 0         | 0    | 0           | 0           | 0   | 0    | 0     | 0    |
| 5087 | D.55        | <i>C. jejuni</i> | 128                  | 8                    | 1                 | NT                | NT                | NT              | 0          | 0    | 0          | 0          | 0         | 0     | 0    | 0         | 0    | 0           | 0           | 0   | 0    | 0     | 0    |
| 5088 | D.56        | <i>C. coli</i>   | 128                  | 8                    | 32                | 64                | 32                | 0.5             | 0          | 17   | 0          | 7          | 4         | 0     | 0    | 0         | 1    | 0           | 1           | 0   | 0    | 0     | 0    |
| 5089 | D.57        | <i>C. coli</i>   | 128                  | 8                    | 32                | 1                 | 1                 | 0.25            | 1          | 16   | 2          | 6          | 0         | 0     | 0    | 0         | 0    | 0           | 0           | 0   | 0    | 0     | 0    |
| 5090 | D.58        | <i>C. jejuni</i> | 128                  | 8                    | 32                | 1                 | 1                 | 0.25            | 5          | 0    | 0          | 0          | 0         | 0     | 0    | 0         | 0    | 0           | 0           | 0   | 0    | 0     | 0    |
| 5091 | D.59        | <i>C. coli</i>   | 64                   | 8                    | 32                | 2                 | 1                 | 0.25            | 8          | 4    | 0          | 0          | 0         | 0     | 0    | 0         | 0    | 0           | 0           | 0   | 0    | 0     | 0    |
| 5092 | D.62        | <i>C. coli</i>   | 128                  | 8                    | 32                | 2                 | 1                 | 0.5             | 1          | 16   | 2          | 6          | 0         | 0     | 0    | 0         | 0    | 0           | 0           | 0   | 0    | 0     | 0    |
| 5093 | D.63        | <i>C. jejuni</i> | NT                   | NT                   | NT                | NT                | NT                | NT              | 0          | 16   | 0          | 0          | 0         | 0     | 0    | 0         | 0    | 0           | 0           | 0   | 0    | 0     | 0    |
| 5094 | GR.01       | <i>C. coli</i>   | 64                   | 4                    | 0.5               | 0                 | 1                 | 0.25            | 5          | 0    | 0          | 0          | 0         | 0     | 0    | 0         | 0    | 0           | 0           | 0   | 0    | 0     | 0    |
| 5095 | GR.02       | <i>C. jejuni</i> | NT                   | NT                   | NT                | NT                | NT                | NT              | 10         | 19   | 0          | 0          | 0         | 0     | 0    | 0         | 0    | 0           | 0           | 0   | 0    | 0     | 0    |
| 5096 | GR.03       | <i>C. coli</i>   | 32                   | 4                    | 128               | 1                 | 32                | 0.12            | 1          | 20   | 0          | 5          | 0         | 0     | 0    | 0         | 0    | 0           | 0           | 0   | 0    | 0     | 0    |
| 5097 | GR.04       | <i>C. coli</i>   | 32                   | 4                    | 64                | 1                 | 32                | 0.25            | 1          | 16   | 5          | 9          | 0         | 0     | 0    | 0         | 0    | 0           | 0           | 0   | 0    | 0     | 0    |
| 5098 | GR.05       | <i>C. coli</i>   | 64                   | 4                    | 32                | >128              | 16                | 0.12            | 11         | 21   | 0          | 3          | 7         | 4     | 0    | 0         | 0    | 1           | 0           | 1   | 0    | 0     | 0    |
| 5099 | GR.06       | <i>C. coli</i>   | 64                   | 4                    | 0.5               | 1                 | 0.5               | 0.12            | 5          | 0    | 0          | 0          | 0         | 0     | 0    | 0         | 0    | 0           | 0           | 0   | 0    | 0     | 0    |
| 5100 | GR.07       | <i>C. jejuni</i> | NT                   | NT                   | NT                | NT                | NT                | NT              | 0          | 17   | 0          | 0          | 0         | 0     | 0    | 0         | 0    | 0           | 0           | 0   | 0    | 0     | 0    |
| 5101 | GR.08       | <i>C. coli</i>   | 32                   | 4                    | 128               | 1                 | 32                | 0.12            | 0          | 16   | 0          | 5          | 0         | 0     | 0    | 0         | 0    | 0           | 0           | 0   | 0    | 0     | 0    |
| 5102 | GR.09       | <i>C. coli</i>   | 64                   | 4                    | 128               | 1                 | 64                | 0.12            | 5          | 4    | 0          | 0          | 0         | 0     | 0    | 0         | 0    | 0           | 0           | 0   | 0    | 0     | 0    |
| 5103 | GR.10       | <i>C. coli</i>   | 64                   | 4                    | 128               | >128              | 32                | 0.12            | 0          | 0    | 3          | 2          | 4         | 0     | 0    | 0         | 4    | 0           | 0           | 1   | 0    | 0     | 0    |
| 5104 | GR.11       | <i>C. coli</i>   | 64                   | 4                    | 128               | 1                 | 1                 | 0.25            | 5          | 4    | 0          | 0          | 0         | 0     | 0    | 0         | 0    | 0           | 0           | 0   | 0    | 0     | 0    |
| 5105 | GR.12       | <i>C. coli</i>   | 64                   | 8                    | 64                | >128              | 32                | 0.25            | 0          | 4    | 0          | 3          | 0         | 0     | 0    | 0         | 0    | 0           | 0           | 0   | 0    | 0     | 0    |
| 5106 | GR.13       | <i>C. coli</i>   | 32                   | 16                   | 64                | 1                 | 0.5               | 0.12            | 0          | 22   | 0          | 0          | 0         | 0     | 0    | 0         | 0    | 0           | 0           | 0   | 0    | 0     | 0    |
| 5107 | GR.14       | <i>C. coli</i>   | 32                   | 4                    | 32                | 128               | 0.5               | 0.12            | 0          | 4    | 0          | 0          | 0         | 0     | 0    | 0         | 0    | 0           | 0           | 0   | 0    | 0     | 0    |
| 5108 | GR.15       | <i>C. coli</i>   | 32                   | 16                   | 128               | 1                 | 32                | 32              | 1          | 0    | 2          | 6          | 0         | 0     | 0    | 2         | 6    | 0           | 1           | 0   | 0    | 0     | 0    |
| 5109 | GR.16       | <i>C. coli</i>   | 32                   | 4                    | 128               | 1                 | 0.5               | 0.25            | 5          | 6    | 0          | 0          | 0         | 0     | 0    | 0         | 0    | 0           | 0           | 0   | 0    | 0     | 0    |
| 5110 | GR.17       | <i>C. coli</i>   | 64                   | 4                    | 128               | 1                 | 64                | 0.12            | 0          | 64   | 0          | 0.25       | 0         | 0     | 0    | 0         | 0    | 0           | 0           | 0   | 0    | 0     | 0    |
| 5111 | GR.18       | <i>C. coli</i>   | NT                   | NT                   | NT                | NT                | NT                | NT              | 0          | 4    | 1          | 0          | 0         | 5     | 0    | 0         | 0    | 2           | 0           | 0   | 0    | 0     | 0    |
| 5112 | GR.19       | <i>C. coli</i>   | 32                   | 8                    | 128               | 1                 | 32                | 0.12            | 0          | 23   | 0          | 0          | 8         | 5     | 0    | 0         | 0    | 2           | 0           | 0   | 0    | 0     | 0    |
| 5113 | GR.20       | <i>C. coli</i>   | 64                   | 4                    | 64                | 1                 | 1                 | 0.25            | 0          | 4</  |            |            |           |       |      |           |      |             |             |     |      |       |      |
